# Supplementary material for: DOT1L activity affects cell lineage progression in the developing brain by controlling metabolic programs
Source: bioRxiv or medRxiv preprint supplement (doi:10.1101/2022.04.08.487591), 2022-04-12
Supplement: Supplementary file [file media-1.pdf]

**Table 1:****KEY RESOURCES TABLE**

| REAGENT or RESOURCE                                                                    | SOURCE                          | IDENTIFIER      |
|----------------------------------------------------------------------------------------|---------------------------------|-----------------|
| <b>Primary antibodies</b>                                                              |                                 |                 |
| Mouse monoclonal anti-dextran antibody, clone DX1                                      | STEMCELL technologies           | Cat# 60026      |
| Rabbit anti-GFP                                                                        | Abcam                           | Cat# ab6556     |
| Goat anti-TUBB3                                                                        | Everest biotech                 | Cat# EB11685    |
| Rabbit anti-Tbr2                                                                       | Abcam                           | Cat# ab183991   |
| Mouse anti-g-tubulin                                                                   | Sigma-Aldrich                   | Cat# T6557      |
| Mouse anti-TuJ1                                                                        | Covance Research Products       | Cat# MMS-435P   |
| Rabbit anti-Arl13b                                                                     | Proteintech Group               | Cat# 17711-1-AP |
| Rabbit anti-H3K27me3                                                                   | Active Motif                    | Cat# 39155      |
| Rabbit anti-EZH2                                                                       | Active Motif                    | Cat# 39901      |
| <b>Secondary antibodies</b>                                                            |                                 |                 |
| Donkey anti-Rabbit IgG (H+L) Highly Cross-Adsorbed Secondary Antibody, Alexa Fluor 488 | Thermo Fisher Scientific        | Cat# A-21206    |
| Donkey anti-Rabbit IgG (H+L) Highly Cross-Adsorbed Secondary Antibody, Alexa Fluor 555 | Thermo Fisher Scientific        | Cat# A-31572    |
| Alexa                                                                                  |                                 |                 |
| Donkey anti-Mouse IgG (H+L) Highly Cross-Adsorbed Secondary Antibody, Alexa Fluor 488  | Thermo Fisher Scientific        | Cat# A-21202    |
| Donkey anti-Mouse IgG (H+L) Highly Cross-Adsorbed Secondary Antibody, Alexa Fluor 647  | Thermo Fisher Scientific Thermo | Cat# A-31571    |
| Donkey anti-Goat IgG (H+L) Cross-Adsorbed Secondary Antibody, Alexa Fluor 647          | Thermo Fisher Scientific        | Cat# A-21447    |
| <b>Tissue culture supplies</b>                                                         |                                 |                 |
| Rat serum                                                                              | Charles River Lab., Japan       | Cat# S-919-S    |

|                                                     |                          |                  |
|-----------------------------------------------------|--------------------------|------------------|
| DMEM-F12, modified low glucose                      | Sigma                    | Cat# D2902       |
| Dextran-Alexafluor 488 (10,000 MW anionic, fixable) | Invitrogen               | Cat# D22913      |
| Agarose, low melting point                          | Roth                     | Cat# 6351.2      |
| B-27 supplement                                     | Invitrogen               | Cat# 17504-044   |
| Cellmatrix type 1 -A                                | Kyowa chemical products  | Cat# 631-00651   |
| L-Glutamine (200 mM)                                | Thermo fisher scientific | Cat# 25030024    |
| HEPES-NaOH (pH 7.2 1M)                              | Sigma-Aldrich            | Cat# H3537       |
| Slice/hemisphere culture incubation box             | MPI-CBG workshop         | N/A              |
|                                                     |                          |                  |
| <b>Chemicals, peptides</b>                          |                          |                  |
| EPZ5676                                             | Selleckchem              | Cat# S7062       |
| DMSO                                                | Thermo Fisher Scientific | Cat# TS-20688    |
| L-Albizziine                                        | Gold Biotechnology       | Cat# A-230-250   |
|                                                     |                          |                  |
| <b>Commercial assays</b>                            |                          |                  |
| Neural Tissue Dissociation Kit (P)                  | Miltenyi Biotec          | Cat# 130-092-628 |
|                                                     |                          |                  |
| <b>Deposited data</b>                               |                          |                  |
| Single cell RNA sequencing (scRNA-seq) data         | This paper               | GEO: GSE176323   |
| Experimental models: Organisms/strains              |                          |                  |
| Wild type mouse: C57BL/6JRj                         | Janvier Labs             | N/A              |
| Transgenic mouse: Tis21+/tm2(Gfp)Wbh                | (Haubensak et al., 2004) | N/A              |
|                                                     |                          |                  |
| <b>Plasmids and Oligonucleotides</b>                |                          |                  |

|                                                                              |                             |                                                                                                                     |
|------------------------------------------------------------------------------|-----------------------------|---------------------------------------------------------------------------------------------------------------------|
| pCAGGS-mCherry                                                               | Genscript                   | N/A                                                                                                                 |
| pCMV-ASNS-GFP                                                                | Origene                     | MG208883                                                                                                            |
| pCMV-GFP                                                                     | Origene                     | PS100010                                                                                                            |
| 192 polyT primers with unique molecular index and cell barcode               | Integrated DNA technologies | Sagar et al., 2018                                                                                                  |
| CEBPG_BS1_ASNS_fw:<br>CAGCATGGATTTGCAGTCAT                                   | Sigma                       | N/A                                                                                                                 |
| CEBPG_BS1_ASNS_rv:<br>TTTCAGGTGGGAGAGAGGATT                                  | Sigma                       | N/A                                                                                                                 |
| CEBPG_BS2_ASNS_fw:<br>AAGCCAGGGTCATCTAGGAAG                                  | Sigma                       | N/A                                                                                                                 |
| CEBPG_BS2_ASNS_rv:<br>GCAGAGACATCCCACATCAAT                                  | Sigma                       | N/A                                                                                                                 |
| ASNS_TSS_fw: TCCCGCTTACCTGAGCACTA                                            | Sigma                       | N/A                                                                                                                 |
| ASNS_TSS_rv: CAGCCACATGATGAAACTTCC                                           | Sigma                       | N/A                                                                                                                 |
| randomhexRT primer,<br>GCCTTGGCACCCGAGAATTCCANNNNNN                          | Integrated DNA technologies | Sagar et al., 2018                                                                                                  |
| RNA PCR Primers, sequences available from Illumina (RP1, RPI1-RPI12, TruSeq) | Integrated DNA technologies | Sagar et al., 2018                                                                                                  |
|                                                                              |                             |                                                                                                                     |
| <b>Tissue and hemisphere culture supplies</b>                                |                             |                                                                                                                     |
| 40% O <sub>2</sub> , 55% N <sub>2</sub> , 5% CO <sub>2</sub>                 | Airliquide                  | N/A                                                                                                                 |
| Sodium hydroxide pellets                                                     | Merck                       | Cat# 106482                                                                                                         |
| Tyrode's salt                                                                | Sigma-Aldrich               | Cat# T2145-10x1L                                                                                                    |
| Sodium bicarbonate                                                           | Merck                       | Cat# 106323                                                                                                         |
| Penicillin-Streptomycin                                                      | Gentaur                     | Cat# PAA P11-010                                                                                                    |
|                                                                              |                             |                                                                                                                     |
| <b>Software and algorithms</b>                                               |                             |                                                                                                                     |
| RaceID3                                                                      | v0.1.6                      | <a href="https://github.com/dg run/RaceID3_Steml D2_package">https://github.com/dg run/RaceID3_Steml D2_package</a> |

|                                                         |           |                                                                                                                                                                                   |
|---------------------------------------------------------|-----------|-----------------------------------------------------------------------------------------------------------------------------------------------------------------------------------|
| RStudio                                                 | v.3.6.1   | <a href="https://www.rstudio.com/">https://www.rstudio.com/</a>                                                                                                                   |
| R                                                       | v1.2.5042 | <a href="https://www.r-project.org/">https://www.r-project.org/</a>                                                                                                               |
| Seurat                                                  | v.3.1.2   | <a href="https://satijalab.org/seurat/">https://satijalab.org/seurat/</a>                                                                                                         |
| Scran                                                   | v3.12     | <a href="https://bioconductor.org/packages/release/bioc/html/scran.html">https://bioconductor.org/packages/release/bioc/html/scran.html</a>                                       |
| SingleCellExperiment                                    | v1.8.0    | <a href="https://www.bioconductor.org/packages/release/bioc/html/SingleCellExperiment.html">https://www.bioconductor.org/packages/release/bioc/html/SingleCellExperiment.html</a> |
| SCENIC                                                  | v1.1.2    | <a href="https://github.com/aertslab/SCENIC">https://github.com/aertslab/SCENIC</a>                                                                                               |
| GENIE3                                                  | v1.12.0   | <a href="https://github.com/aertslab/GENIE3">https://github.com/aertslab/GENIE3</a>                                                                                               |
| RcisTarget                                              | v1.10.0   | <a href="https://www.bioconductor.org/packages/release/bioc/html/RcisTarget.html">https://www.bioconductor.org/packages/release/bioc/html/RcisTarget.html</a>                     |
| AUCell                                                  | v1.12.0   | <a href="https://bioconductor.org/packages/release/bioc/html/AUCell.html">https://bioconductor.org/packages/release/bioc/html/AUCell.html</a>                                     |
| Bioconductor                                            | v3.12     | <a href="https://www.bioconductor.org/">https://www.bioconductor.org/</a>                                                                                                         |
| clusterProfiler                                         | v3.14.0   | <a href="https://bioconductor.org/packages/release/bioc/html/clusterProfiler.html">https://bioconductor.org/packages/release/bioc/html/clusterProfiler.html</a>                   |
| Prism                                                   | v.8.0.    | <a href="https://www.graphpad.com/scientific-software/prism/">https://www.graphpad.com/scientific-software/prism/</a>                                                             |
| <b>Single cell RNA sequencing reagents and supplies</b> |           |                                                                                                                                                                                   |

|                                                                              |                             |                                                                                                                                       |
|------------------------------------------------------------------------------|-----------------------------|---------------------------------------------------------------------------------------------------------------------------------------|
| RNaseOUT                                                                     | Invitrogen                  | Cat# 10777-019                                                                                                                        |
| Superscript II                                                               | Invitrogen                  | Cat# 18064-014                                                                                                                        |
| Second Strand Buffer                                                         | Invitrogen                  | Cat# 10812-014                                                                                                                        |
| E. coli DNA ligase                                                           | Invitrogen                  | Cat# 18052-019                                                                                                                        |
| E. coli RNaseH                                                               | Invitrogen                  | Cat# 18021-071                                                                                                                        |
| E. coli DNA polymerase                                                       | Invitrogen                  | Cat# 18010-025                                                                                                                        |
| AMPure XP beads                                                              | Beckman Coulter             | Cat# A63880                                                                                                                           |
| RNAClean XP beads                                                            | Beckman Coulter             | Cat# A63987                                                                                                                           |
| MEGAscript T7 Transcription Kit                                              | Invitrogen                  | Cat# AM1334                                                                                                                           |
| Phusion High-Fidelity PCR Master Mix with HF Buffer                          | NEB                         | Cat# M0531                                                                                                                            |
| ExoSAP-IT For PCR Product Clean-Up                                           | Affymetrix                  | Cat# 78200                                                                                                                            |
| NEBNext Magnesium RNA Fragmentation Module                                   | NEB                         | Cat# E6150S                                                                                                                           |
| randomhexRT primer,<br>GCCTTGGCACCCGAGAATTCCANNNNNN                          | Integrated DNA technologies | Sagar et al., 2018                                                                                                                    |
| RNA PCR Primers, sequences available from Illumina (RP1, RPI1-RPI12, TruSeq) | Integrated DNA technologies | Sagar et al., 2018                                                                                                                    |
| 192 polyT primers with unique molecular index and cell barcode               | Integrated DNA technologies | Sagar et al., 2018                                                                                                                    |
|                                                                              |                             |                                                                                                                                       |
| <b>Other</b>                                                                 |                             |                                                                                                                                       |
| scRNA-seq data analyses workflows                                            | This paper                  | <a href="https://github.com/Vogel-lab/DOT1L_activity_neocortex-paper">https://github.com/Vogel-lab/DOT1L_activity_neocortex-paper</a> |
